# Supplementary material for: Simulation of Graphene Field-Effect Transistor Biosensors for Bacterial Detection
Source: PubMed Central journal article supplement (PMC6021923; doi:10.3390/s18061715), 2018-05-25
Supplement: sensors-18-01715-s001.pdf [file sensors-18-01715-s001.pdf]

# Simulation of Graphene Field-Effect Transistor Biosensors for Bacterial Detection

Guangfu Wu<sup>1,2,3</sup>, M. Meyyappan<sup>4</sup> and King Wai Chiu Lai<sup>1,2,\*</sup>

- 1 Department of Mechanical and Biomedical Engineering, City University of Hong Kong, 83 Tat Chee Avenue, Kowloon, Hong Kong, China; [guangfuwu1987@gmail.com](mailto:guangfuwu1987@gmail.com)
- 2 Centre for Robotics and Automation, City University of Hong Kong, 83 Tat Chee Avenue, Kowloon, Hong Kong, China; [kinglai@cityu.edu.hk](mailto:kinglai@cityu.edu.hk)
- 3 Shanghai Key Laboratory of Modern Optical System, Engineering Research Center of Optical Instrument and System (Ministry of Education), University of Shanghai for Science and Technology, Shanghai
- 4 NASA Ames Research Center, Moffett Field, CA, USA; [m.meyyappan@nasa.gov](mailto:m.meyyappan@nasa.gov)

## Contents

1. **Motion of bacteria at different concentrations**
2. **Transfer curves of graphene device before and after exposure to bacterial solution**
3. **The slope from the simulation and experiment during the rise period.**

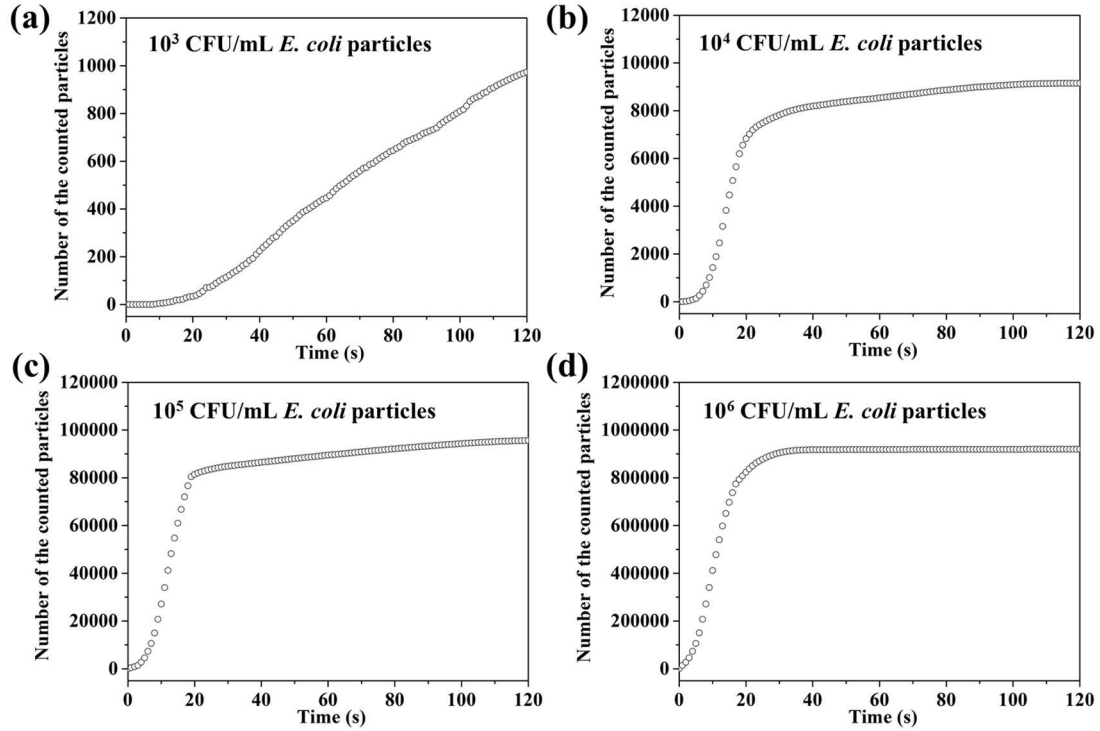

**Figure S1.** (a) The bacterial distribution from 0 to 120 s when  $10^3$  CFU/mL *E. coli* was simulated. (b) The bacterial distribution from 0 to 120 s when  $10^4$  CFU/mL *E. coli* was simulated. (c) The bacterial distribution from 0 to 120 s when  $10^5$  CFU/mL *E. coli* was simulated. (d) The bacterial distribution from 0 to 120 s when  $10^6$  CFU/mL *E. coli* was simulated.

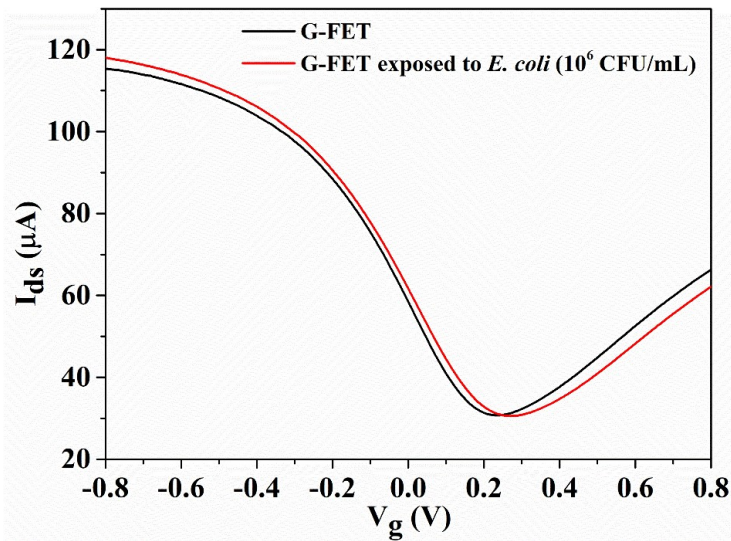

**Figure S2.** The transfer characteristics of the G-FET (black) and  $10^6$  CFU/mL of *E. coli* treated G-FET (red).

**Table S1.** The slope from the simulation and experiment during the rise period.

| Slope ( $\mu\text{A/s}$ ) for the concentration of 100 CFU/mL   | Simulation           | Experiment           |
|-----------------------------------------------------------------|----------------------|----------------------|
| For the first rise period (0 - 30s)                             | $3.17 \cdot 10^{-4}$ | $4.6 \cdot 10^{-3}$  |
| For the second rise period (31s - 120s)                         | $1.36 \cdot 10^{-3}$ | $7.33 \cdot 10^{-4}$ |
| Slope ( $\mu\text{A/s}$ ) for the concentration of 11950 CFU/mL | Simulation           | Experiment           |
| For the first rise period (0 - 30s)                             | $8.67 \cdot 10^{-2}$ | $5.10 \cdot 10^{-2}$ |
| For the second rise period (31s - 90s)                          | $2.74 \cdot 10^{-3}$ | $6.24 \cdot 10^{-3}$ |
| For the saturation period (91s - 120s)                          | $7.3 \cdot 10^{-4}$  | $7.77 \cdot 10^{-4}$ |
